# Supplementary figures and images for: Accuracy and application of the motif expression decomposition method in dissecting transcriptional regulation
Source: PubMed Central journal article supplement — Nucleic Acids Res. 2008 Apr 14;36(10):3185–93. doi: 10.1093/nar/gkn127 (PMC2425491; doi:10.1093/nar/gkn127), 2008-04-14

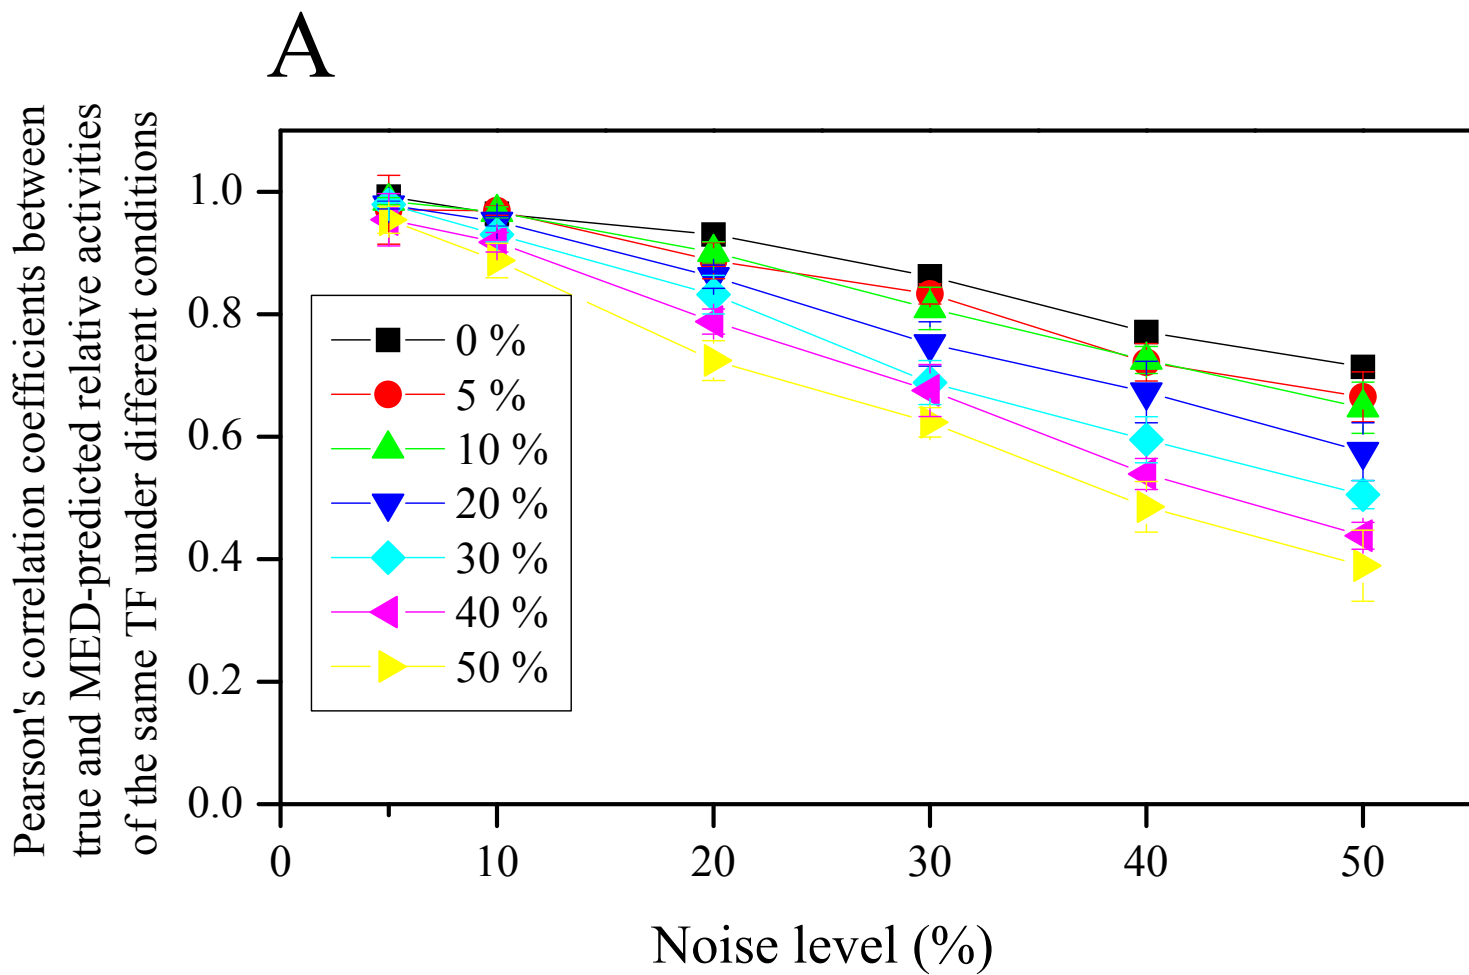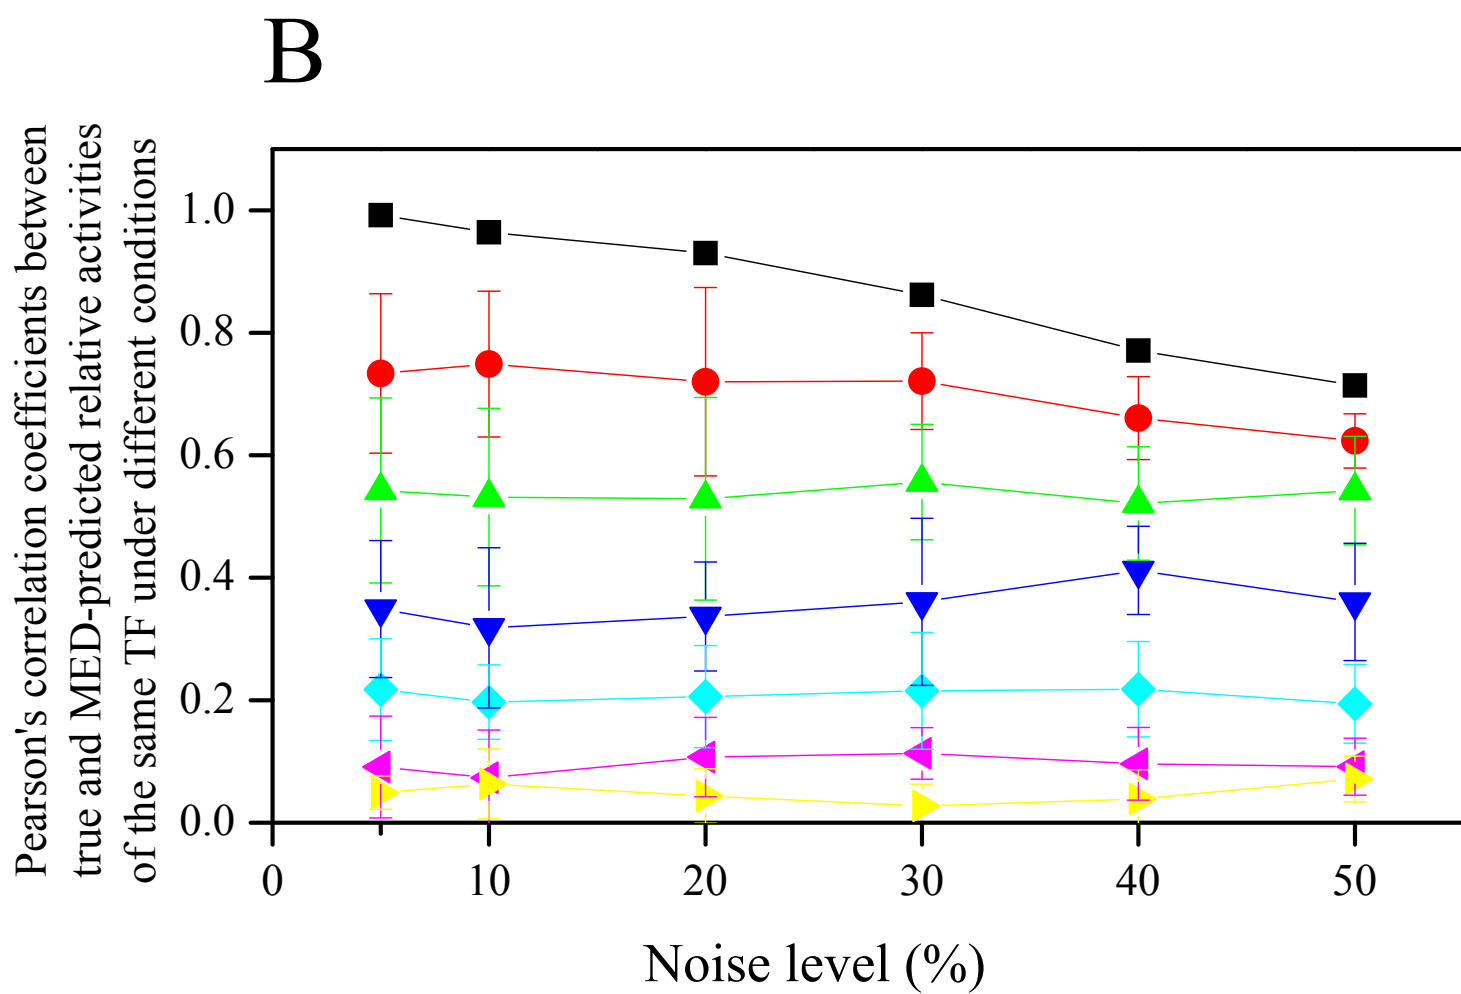

Figure S3

Supplement: gkn127_1.pdf [file gkn127_1.pdf]
